# Supplementary material for: Bread Fortified with Cooked Purple Potato Flour and Citrus Albedo: An Evaluation of Its Compositional and Sensorial Properties
Source: MDPI journal article supplement (doi:10.3390/foods10050942), 2021-04-25
Supplement: s1 [file s1]

**Table S1** UHPLC-HR-ESI-MS/MS data of potato constituents detected in sourdough bread + purple potatoes (SB+P) and baker's yeast bread + purple potatoes (YB+P).

| Peak* | Compound                          | <i>t<sub>R</sub></i><br>(min) | HR-[M-H] <sup>-</sup><br>( <i>m/z</i> ) | HR-[M+H] <sup>+</sup><br>( <i>m/z</i> ) | Negative<br>Product Ions<br>( <i>m/z</i> )**       | Positive<br>Product Ions<br>( <i>m/z</i> )** | Error<br>(ppm) |
|-------|-----------------------------------|-------------------------------|-----------------------------------------|-----------------------------------------|----------------------------------------------------|----------------------------------------------|----------------|
| 1     | Saccharose                        | 0.5                           | 377.0857<br>([M+HCOO] <sup>-</sup> )    | 381.0786<br>([M+K] <sup>+</sup> )       | 341.10, 179.05                                     | 219.03                                       | -1.84          |
| 2     | Citric acid isomer I              | 0.6                           | 191.0192                                |                                         | 173.01, 129.02,<br><b>111.01</b> , 87.01,<br>85.03 |                                              | -2.61          |
| 3     | Citric acid isomer II             | 0.7                           | 191.0192                                |                                         | 173.01, 129.02,<br><b>111.01</b> , 87.01,<br>85.03 |                                              | -2.61          |
| 4     | Caffeoylquinic acid<br>isomer I   | 2.9                           | 353.0877                                |                                         | <b>191.05</b> , 179.03,<br>135.04                  |                                              | -0.28          |
| 5     | Caffeoylquinic acid<br>isomer II  | 3.0                           | 353.0877                                |                                         | <b>191.05</b> , 179.03,<br>135.04                  |                                              | -2.23          |
| 6     | Caffeic acid                      | 4.5                           | 179.0345                                |                                         | 135.0444                                           |                                              |                |
| 7     | Caffeoylquinic acid<br>isomer III | 4.7                           | 353.0877                                | 355.1018                                | <b>191.05</b> , 179.03,<br>173.045, 135.04         | <b>163.04</b> , 135.04,<br>89.04             | -0.28          |
| 8     | Leucine/isoleucine                | 0.6                           |                                         | 132.1019                                |                                                    | <b>86.09</b> , 69.07                         | 0              |
| 9     | Tyrosine                          | 0.7                           |                                         | 182.0811                                |                                                    | <b>165.05</b> , 136.07,<br>123.04, 91.05     | -3.29          |
| 10    | Phenylalanine                     | 1.7                           |                                         | 166.0861                                |                                                    | <b>120.08</b> , 103.05,<br>91.05             | -0.60          |
| 11    | Tryptophan                        | 2.9                           |                                         | 205.0970                                |                                                    | <b>188.07</b> , 146.06,<br>118.07, 91.05     | -0.49          |
| 12    | α-Chaconine                       | 15.3                          |                                         | 852.5081                                |                                                    | 706.45, 544.37,<br>398.33                    | -2.58          |
| 13    | α-Solanine                        | 15.3                          |                                         | 868.5036                                |                                                    | 722.44, 398.34                               | -1.96          |

\*Peak numbers correspond with those in Figure 2. \*\* The base ion peaks generated in the ESI-MS/MS experiments are shown in bold.
