# Supplementary material for: Bread Fortified with Cooked Purple Potato Flour and Citrus Albedo: An Evaluation of Its Compositional and Sensorial Properties
Source: MDPI journal article supplement (doi:10.3390/foods10050942), 2021-04-25

**Figure S1.** UHPLC-HR-ESI-MS profiles of hydroalcoholic extracts of purple potatoes (P), shown in negative and positive ion mode, and *Citrus x aurantium* albedo (A). For peak data see Table S5.

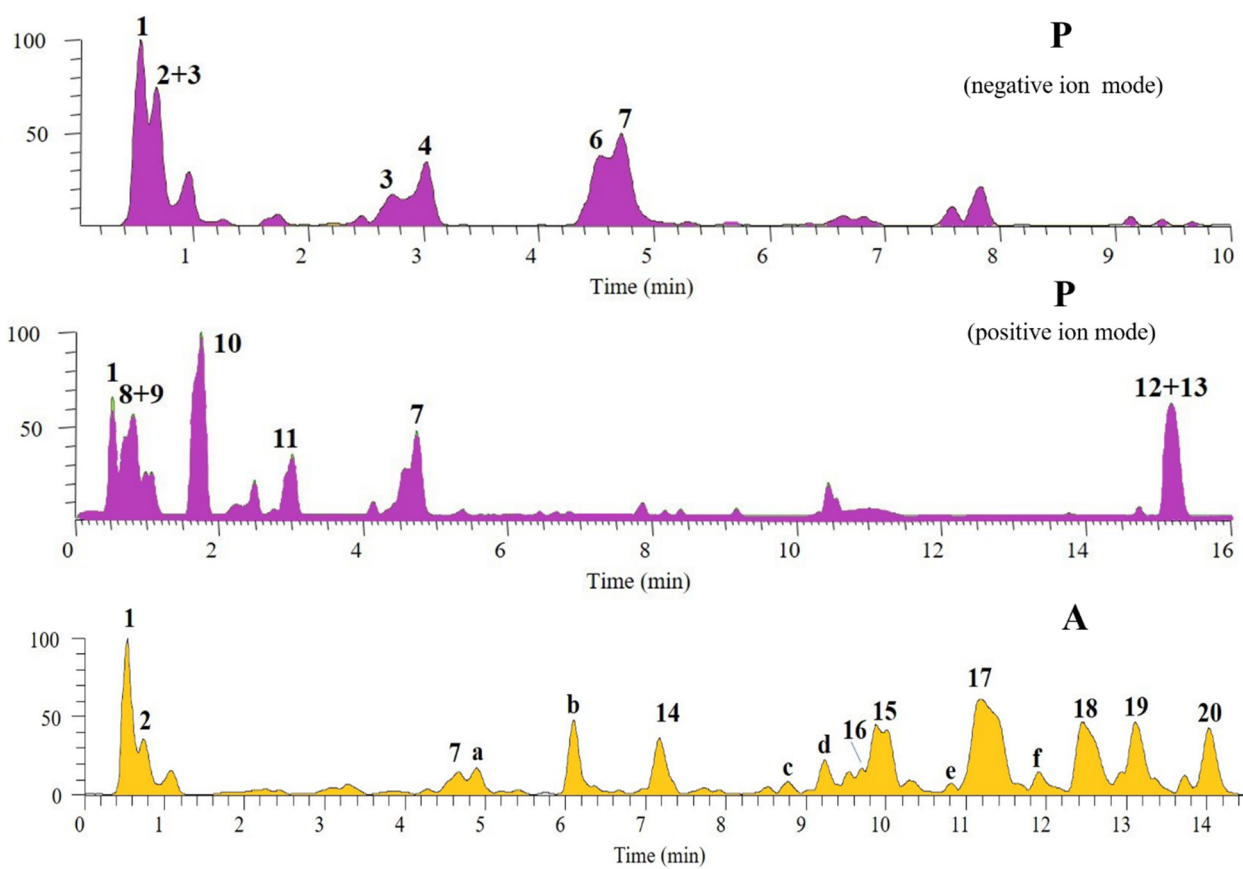

Supplement: s1 [file s1]
