# Supplementary material for: Bread Fortified with Cooked Purple Potato Flour and Citrus Albedo: An Evaluation of Its Compositional and Sensorial Properties
Source: MDPI journal article supplement (doi:10.3390/foods10050942), 2021-04-25
Supplement: s1 [file s1]

**Table S2** UHPLC-HR-ESI-MS/MS data of constituents from albedo detected in sourdough bread + purple potatoes + albedo (SB+PA) and baker's yeast bread + purple potatoes + albedo (YB+PA).

| Peak* | Compound                                                      | <i>t<sub>R</sub></i><br>(min) | HR-<br>[M-H] <sup>-</sup><br>( <i>m/z</i> ) | Negative<br>Product Ions<br>( <i>m/z</i> )**                | Error<br>(ppm) |
|-------|---------------------------------------------------------------|-------------------------------|---------------------------------------------|-------------------------------------------------------------|----------------|
|       | <b>Flavone C-glucosides</b>                                   |                               |                                             |                                                             |                |
| 14    | vicenin-2<br>(apigenin 6,8-di-C-glucoside)                    | 7.2                           | 593.1517                                    | 503.12, 473.11,<br>383.08, <b>353.07</b>                    | +1.01          |
|       | <b>Flavone O-glycosides</b>                                   |                               |                                             |                                                             |                |
| 16    | Apigenin 7-O-<br>rutinoside/neohesperidoside                  | 11.2                          | 577.1567                                    | 413.01, <b>269.05</b>                                       | +0.87          |
|       | <b>Flavanone O-glycosides</b>                                 |                               |                                             |                                                             |                |
| 15    | Eriocitrin (eriodictyol 7-O-<br>rutinoside)                   | 10.0                          | 595.1671                                    | 459.11, 287.06,<br><b>151.00</b> , 135.04                   | +0.50          |
| 17    | Naringin (naringenin 7-O-<br>neohesperidoside)                | 11.5                          | 579.1721                                    | 459.12, 271.06,<br><b>151.00</b>                            | +0.34          |
| 18    | Neohesperidin (hesperetin 7-<br>O-neohesperidoside)           | 12.6                          | 609.1825                                    | 489.14, <b>301.07</b> ,<br>286.05                           | +0.16          |
|       | <b>3-Hydroxy-3 methyl-glutaryl<br/>flavanone O-glycosides</b> |                               |                                             |                                                             |                |
| 19    | Melitidin                                                     | 13.2                          | 723.2146                                    | 661.21, 621.18,<br>579.17, 459.12,<br>271.06, <b>151.00</b> | +0.69          |
| 20    | Brutieridin                                                   | 14.0                          | 753.2249                                    | 691.22, 651.19,<br>609.18, <b>301.07</b>                    | +0.27          |

\*Peak numbers correspond with those in Figure 3. \*\* The base ion peaks generated in the ESI-MS/MS experiments are shown in bold.
