# Supplementary material for: Bread Fortified with Cooked Purple Potato Flour and Citrus Albedo: An Evaluation of Its Compositional and Sensorial Properties
Source: MDPI journal article supplement (doi:10.3390/foods10050942), 2021-04-25
Supplement: s1 [file s1]

**Table S3** LC-HR-ESI-MS/MS data of potato anthocyanins (P) detected in sourdough bread + purple potatoes (SB+P), baker's yeast bread + purple potatoes (YB+P), sourdough bread + purple potatoes + albedo (SB+PA) and baker's yeast bread + purple potatoes + albedo (YB+PA).

| Peak* | Compound                                                                      | $t_R$<br>(min) | HR-<br>[M+H] <sup>+</sup><br>( $m/z$ ) | Positive<br>Product Ions<br>( $m/z$ )** | Error<br>(ppm) |
|-------|-------------------------------------------------------------------------------|----------------|----------------------------------------|-----------------------------------------|----------------|
| 21    | Malvidin 3- <i>O</i> -rutinoside-5- <i>O</i> -glucoside                       | 2.0            | 801.2426                               | 639.19, 493.13, <b>331.08</b>           | -2.62          |
| 22    | Malvidin 3- <i>O</i> -caffeoyl-rutinoside-5- <i>O</i> -glucoside              | 2.8            | 963.2739                               | 801.22, 493.13, <b>331.08</b>           | -2.60          |
| 23    | Petunidin 3- <i>O</i> -caffeoyl-rutinoside-5- <i>O</i> -glucoside             | 2.9            | 949.2589                               | 787.21, 479.11, <b>317.06</b>           | -2.00          |
| 24    | Petunidin 3- <i>O</i> -feruloyl-rutinoside-5- <i>O</i> -glucoside             | 3.1            | 963.2731                               | 801.22, 479.12, <b>317.06</b>           | -3.43          |
| 25    | Petunidin 3- <i>O</i> - <i>p</i> -coumaroyl-rutinoside-5- <i>O</i> -glucoside | 3.2            | 933.2643                               | 771.21, 479.11, <b>317.06</b>           | -1.71          |
| 26    | Malvidin 3- <i>O</i> - <i>p</i> -coumaroyl-rutinoside-5- <i>O</i> -glucoside  | 3.4            | 947.2794                               | 785.23, 493.13, <b>331.08</b>           | -2.28          |
| 27    | Malvidin 3- <i>O</i> -feruloyl-rutinoside-5- <i>O</i> -glucoside              | 3.5            | 977.2893                               | 815.23, 493.13, <b>331.08</b>           | -2.86          |

\*Peak numbers correspond with those in Figure 4. \*\*The base ion peaks generated in the ESI-MS/MS experiments are shown in bold.
