# Supplementary material for: Bread Fortified with Cooked Purple Potato Flour and Citrus Albedo: An Evaluation of Its Compositional and Sensorial Properties
Source: MDPI journal article supplement (doi:10.3390/foods10050942), 2021-04-25
Supplement: s1 [file s1]

**Table S5** UHPLC-HR-ESI-MS/MS data of compounds **a-f** detected in the *Citrus aurantium* albedo (A), but not found in bread samples enriched with A.

| Peak*    | Compound                                                        | <i>t<sub>R</sub></i><br>(min) | HR-[M-H] <sup>-</sup><br>( <i>m/z</i> ) | Negative<br>Product Ions<br>( <i>m/z</i> )** | Error<br>(ppm) |
|----------|-----------------------------------------------------------------|-------------------------------|-----------------------------------------|----------------------------------------------|----------------|
| <b>a</b> | Caffeic acid glucoside                                          | 4.9                           | 341.1239                                | <b>179.03</b> , 135.0                        | -0.29          |
| <b>b</b> | Feruloyl acid glucoside                                         | 6.1                           | 355.1035                                | 193.05,<br><b>175.04</b> , 149.06            | 0.00           |
| <b>c</b> | Lucenin-2 4'-methyl ether<br>(diosmetin 6,8-di-C-<br>glucoside) | 8.9                           | 623.1619                                | 503.12,<br>413.09,<br>383.08, <b>312.06</b>  | +0.16          |
| <b>d</b> | Naringin glucoside                                              | 9.2                           | 741.2254                                | 579.17,<br><b>271.06</b> , 151.00            | +0.94          |
| <b>e</b> | Diosmetin 8-C-<br>glucoside/6-C-glucoside                       | 10.8                          | 461.1091                                | 361.08,<br>341.07, <b>298.05</b>             | +0.43          |
| <b>f</b> | 3-Hydroxy-3-methyl-<br>glutaryl-<br>neoericitrin/eriocitrin     | 11.9                          | 739.2099                                | 595.17,<br>287.06, <b>151.00</b>             | +1.08          |

\*Peak numbers correspond with those in Figure 1S. \*\*The base ion peaks generated in the ESI-MS/MS experiments are shown in bold.
